# Supplementary material
Source: publisher figshare collection journal article supplement (https://sage.figshare.com/ndownloader/files/38308149)
Supplement: Supplementary file 1 [file 38308149]

## Statement of clinical relevance

Anatomical landmarks play a crucial role in radiograph analysis in dentistry. Automatic detection of mental foramen is potentially time-saving and can be used as a part of the mandibular cortical width measurement algorithm for predicting osteoporosis and quality assessment of cortical bone.
